# Supplementary material for: Measuring Neighborhood Landscapes: Associations between a Neighborhood’s Landscape Characteristics and Colon Cancer Survival
Source: MDPI journal article supplement (doi:10.3390/ijerph18094728), 2021-04-29
Supplement: s1 [file s1]

## Supplementary Files

**Table S1:** Hazard Rates of individual-level factors from the multivariate model.

| Individual-Level Factors                          | Coefficient | Hazard Rate<br>(95% Confidence<br>Interval) | P-Value |
|---------------------------------------------------|-------------|---------------------------------------------|---------|
| <i>Male</i>                                       | Reference   |                                             |         |
| <i>Female</i>                                     | -0.21       | 0.81 (0.73-0.9)                             | <0.001  |
| <i>Age at diagnosis</i>                           | 0.02        | 1.025 (1.02-1.03)                           | <0.001  |
| <i>Regional. direct extensions only</i>           | Reference   |                                             |         |
| <i>Regional. lymph nodes only</i>                 | -0.39       | 0.68 (0.58-0.78)                            | <0.001  |
| <i>Regional. direct extension and lymph nodes</i> | 0.6         | 1.83 (1.62-2.07)                            | <0.001  |
| <i>NH-White</i>                                   | Reference   |                                             |         |
| <i>NH-Black</i>                                   | 0.45        | 1.56 (1.35-1.81)                            | <0.001  |
| <i>Hispanic</i>                                   | 0.49        | 1.64 (1.37-1.96)                            | <0.001  |
| <i>Asian/Pacific Islanders</i>                    | 0.2         | 1.22 (0.92-1.62)                            | 0.17    |
| <i>Others</i>                                     | 0.13        | 1.14 (0.79-1.64)                            | 0.45    |
| <i>Non-Movers</i>                                 | Reference   |                                             |         |
| <i>Movers</i>                                     | 1.15        | 3.17 (2.84-3.53)                            | <0.001  |

Note: Hazard Rates and 95% confidence intervals are exponentiated the parameter estimates/coefficients

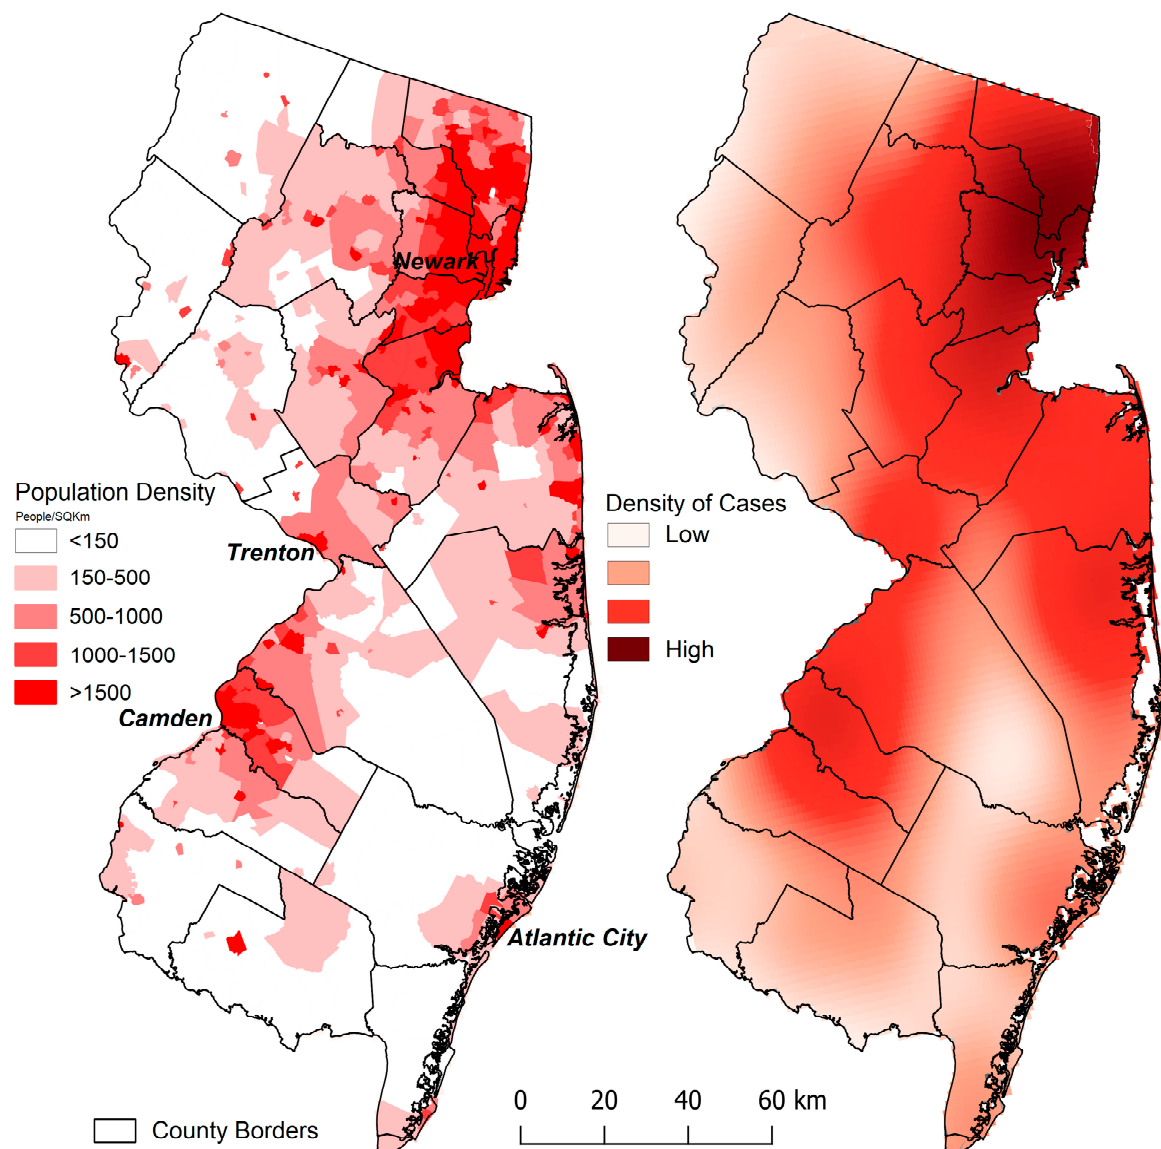

**Figure S1:** Distribution of population density by municipality and interpolated density of colon cancer patients' residences. The geographic distribution of patients reflects the statewide population density patterns.

Note: Density of Cases was interpolated on a spatial 1 km grid to keep confidentiality.
